# Supplementary material for: Trends in Health-Risk Behaviors and Psychological Distress among Australian First-Year University Students
Source: MDPI journal article supplement (doi:10.3390/ijerph21050620), 2024-05-14
Supplement: s1 [file s1]

Supplementary Table S1. The proportion of first year, undergraduate University of Newcastle students aged 17-24 years meeting and not meeting the guidelines for each of the health risk behaviour and mental health outcomes, and the number without a result (missing), for each of the survey years (2016, 2017, 2019, 2020).

| <i>Health behaviour</i>                  |                                | <i>2016</i><br>( <i>N</i> = 1300) | <i>2017</i><br>( <i>N</i> = 484) | <i>2019</i><br>( <i>N</i> = 456) | <i>2020</i><br>( <i>N</i> = 571) |
|------------------------------------------|--------------------------------|-----------------------------------|----------------------------------|----------------------------------|----------------------------------|
| Meeting Fruit Consumption Guidelines     | Not meeting                    | 562 (43%)                         | 220 (45%)                        | 233 (51%)                        | 279 (49%)                        |
|                                          | Meeting                        | 738 (57%)                         | 264 (55%)                        | 223 (49%)                        | 292 (51%)                        |
|                                          | Missing                        | 0                                 | 0                                | 0                                | 0                                |
| Meeting Vegetable Consumption Guidelines | Not meeting                    | 1196 (92%)                        | 451 (93%)                        | 426 (93%)                        | 522 (91%)                        |
|                                          | Meeting                        | 104 (8.0%)                        | 33 (6.8%)                        | 30 (6.6%)                        | 49 (8.6%)                        |
|                                          | Missing                        | 0                                 | 0                                | 0                                | 0                                |
| Frequency of Breakfast Consumption       | Missing                        | 0                                 | 0                                | 0                                | 0                                |
| Frequency of Takeaway Consumption        | Less than everyday             | 585 (45%)                         | 225 (46%)                        | 235 (52%)                        | 321 (56%)                        |
|                                          | Everyday                       | 715 (55%)                         | 259 (54%)                        | 221 (48%)                        | 250 (44%)                        |
|                                          | Missing                        | 0                                 | 0                                | 0                                | 0                                |
| Performing Sufficient Physical Activity  | Less than 1-2 times/wk         | 832 (64%)                         | 296 (61%)                        | 288 (63%)                        | 328 (57%)                        |
|                                          | 1-2 times/wk or more           | 468 (36%)                         | 188 (39%)                        | 168 (37%)                        | 243 (43%)                        |
|                                          | Missing                        | 9                                 | 24                               | 11                               | 28                               |
| Sitting Time                             | Insufficient physical activity | 306 (24%)                         | 150 (33%)                        | 119 (27%)                        | 123 (23%)                        |
|                                          | Sufficient physical activity   | 985 (76%)                         | 310 (67%)                        | 326 (73%)                        | 420 (77%)                        |
| Tobacco Smoking Use                      | Missing                        | 0                                 | 0                                | 0                                | 0                                |
|                                          | < 8 hours/day                  | 814 (63%)                         | 274 (57%)                        | 307 (67%)                        | 362 (63%)                        |
|                                          | > or = 8 hours/day             | 486 (37%)                         | 210 (43%)                        | 149 (33%)                        | 209 (37%)                        |
| Alcohol Single Occasion Risk             | Missing                        | 0                                 | 0                                | 0                                | 0                                |
|                                          | Non-smoker                     | 1208 (93%)                        | 462 (95%)                        | 419 (92%)                        | 534 (94%)                        |
|                                          | Smoker                         | 92 (7.1%)                         | 22 (4.5%)                        | 37 (8.1%)                        | 37 (6.5%)                        |
| Lifetime Drug Use                        | Missing                        | 0                                 | 0                                | 0                                | 0                                |
|                                          | Low                            | 792 (61%)                         | 265 (55%)                        | 270 (59%)                        | 369 (65%)                        |
|                                          | High                           | 508 (39%)                         | 219 (45%)                        | 186 (41%)                        | 202 (35%)                        |
| Sleep                                    | Missing                        | 61                                | 8                                | 0                                | 0                                |
|                                          | Drug use                       | 390 (31%)                         | 173 (36%)                        | 186 (41%)                        | 199 (35%)                        |
|                                          | No drug use                    | 849 (69%)                         | 303 (64%)                        | 270 (59%)                        | 372 (65%)                        |
| Sleep                                    | Missing                        | 0                                 | 0                                | 0                                | 0                                |

| <i>Health behaviour</i>        |                                             | 2016<br>(N = 1300) | 2017<br>(N = 484) | 2019<br>(N = 456) | 2020<br>(N = 571) |
|--------------------------------|---------------------------------------------|--------------------|-------------------|-------------------|-------------------|
| Kessler Psychological Distress | Not meeting recommendations (under or over) | 375 (29%)          | 126 (26%)         | 92 (20%)          | 149 (26%)         |
|                                | Meeting recommendations                     | 925 (71%)          | 358 (74%)         | 364 (80%)         | 422 (74%)         |
|                                | Missing                                     | 39                 | 22                | 13                | 19                |
|                                | Low                                         | 817 (65%)          | 226 (49%)         | 206 (47%)         | 249 (45%)         |
|                                | High                                        | 444 (35%)          | 236 (51%)         | 237 (53%)         | 303 (55%)         |
